# Supplementary figures and images for: Palmitic Acid Inhibits the Growth and Metastasis of Gastric Cancer by Blocking the STAT3 Signaling Pathway
Source: MDPI journal article supplement (doi:10.3390/cancers15020388), 2023-01-06

Figure 4A

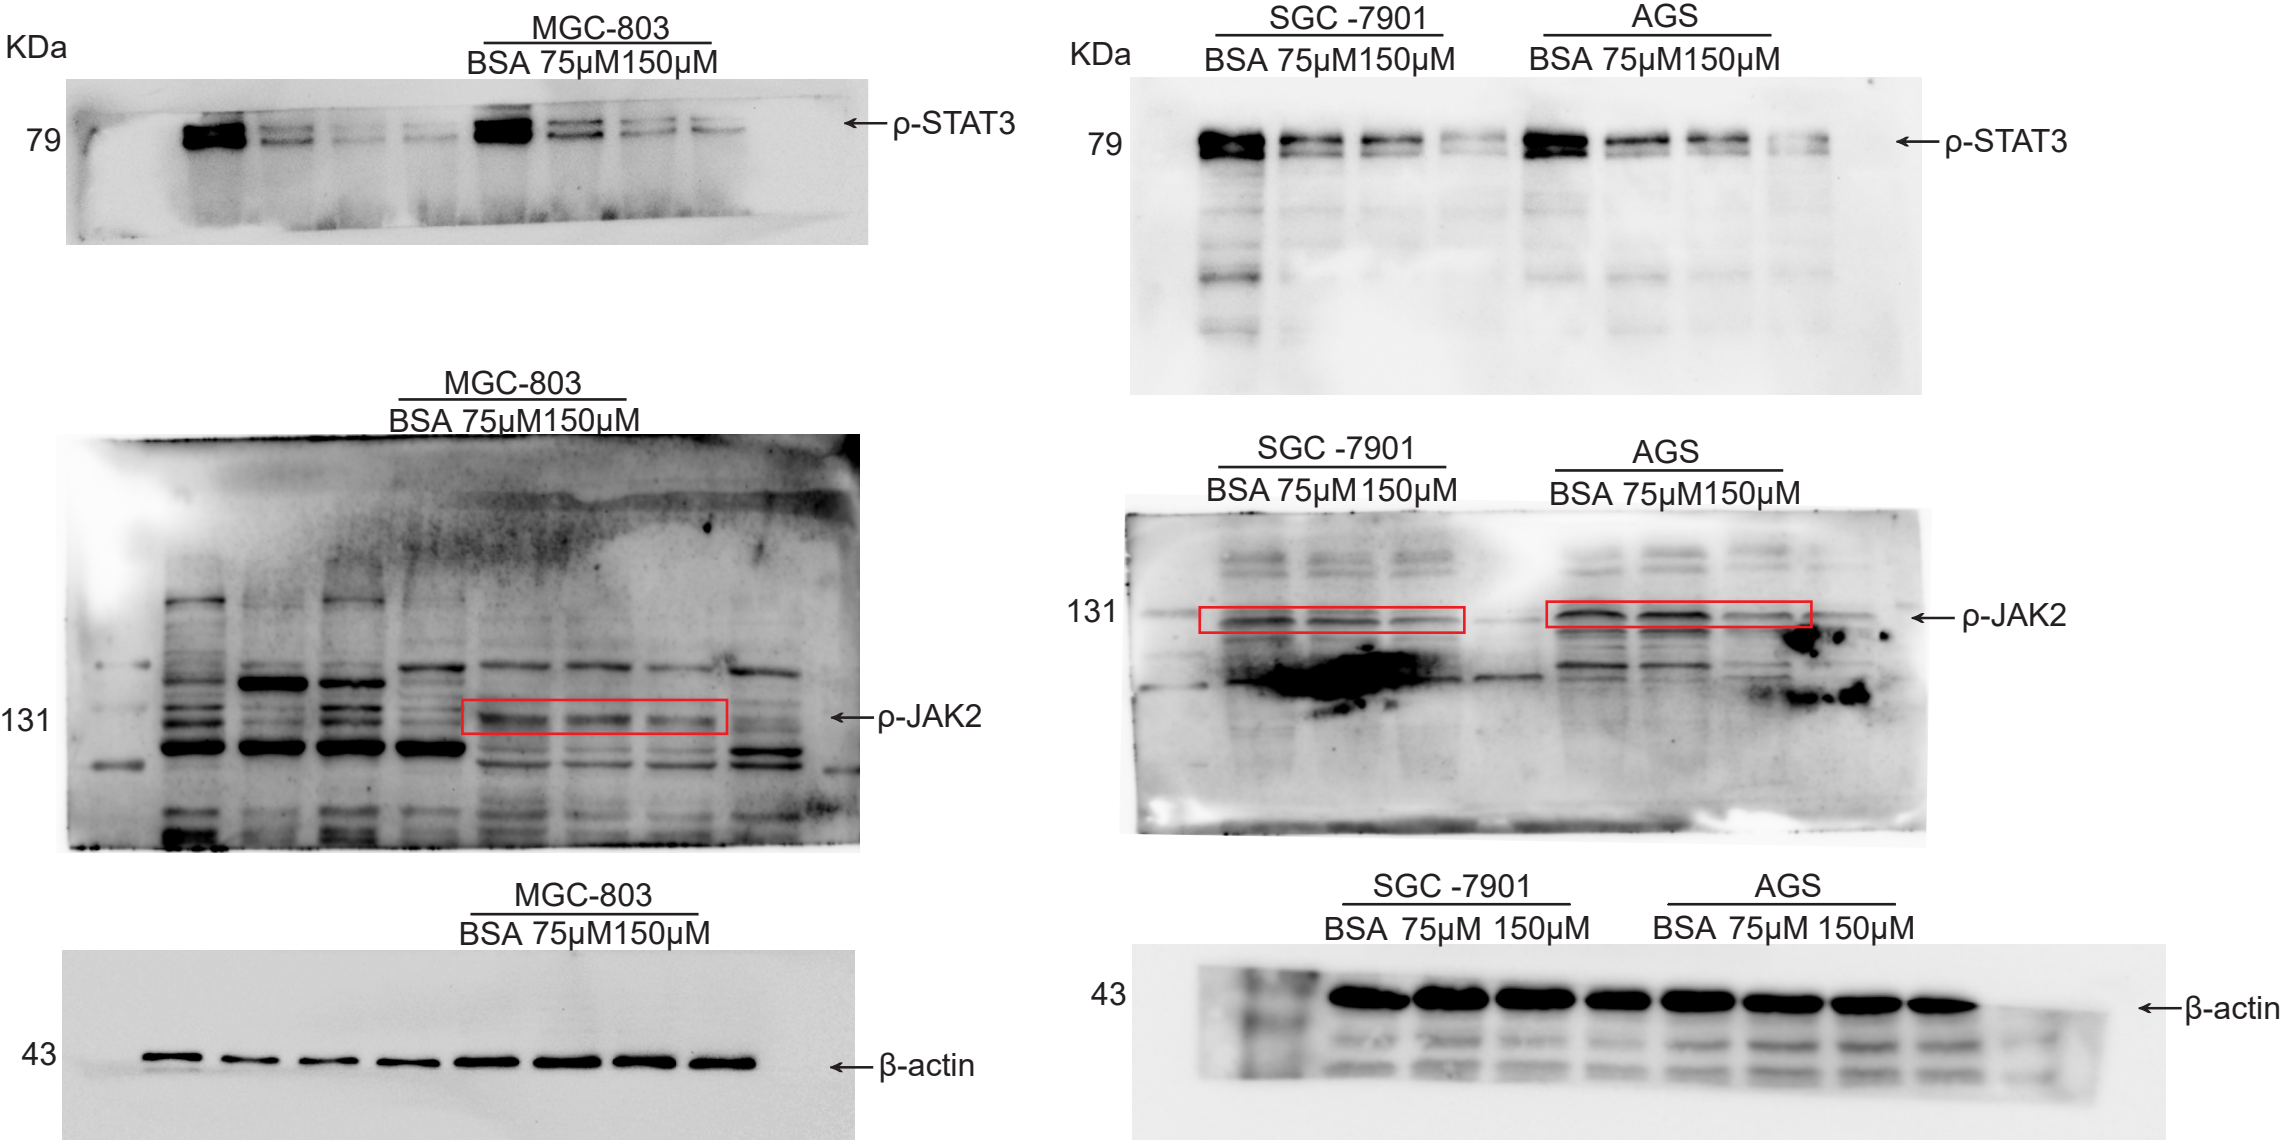

Supplement: s1 [file s1]

Figure 4D

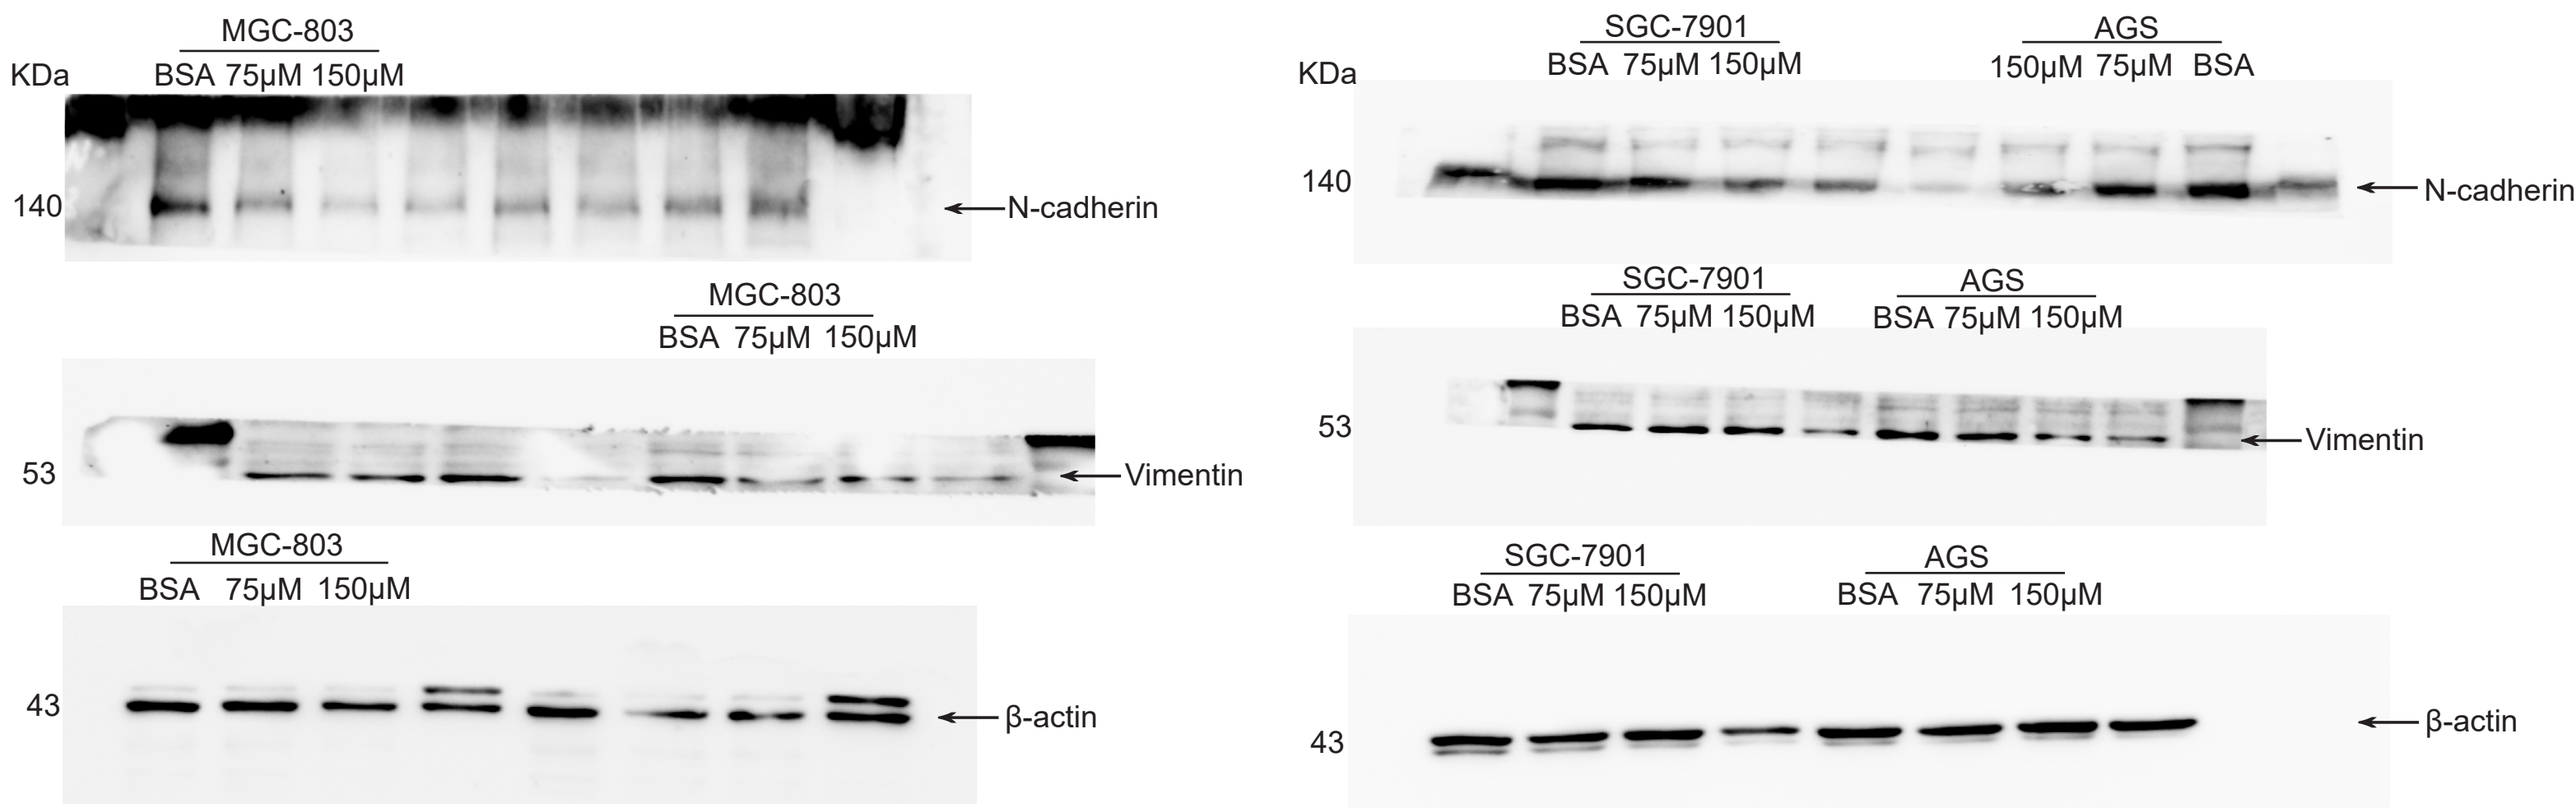

Supplement: s1 [file s1]

Figure 4B

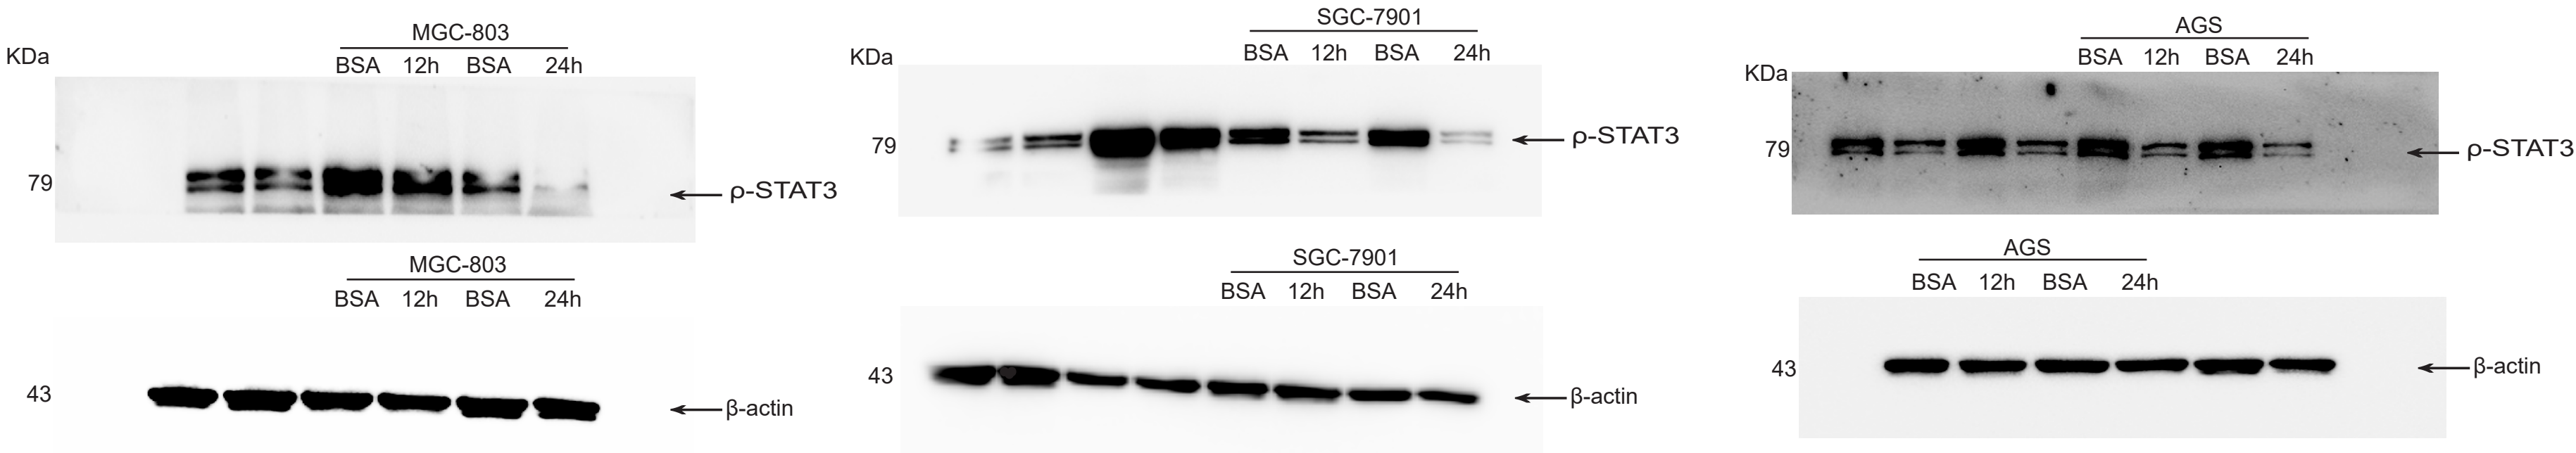

Supplement: s1 [file s1]

Figure 2B

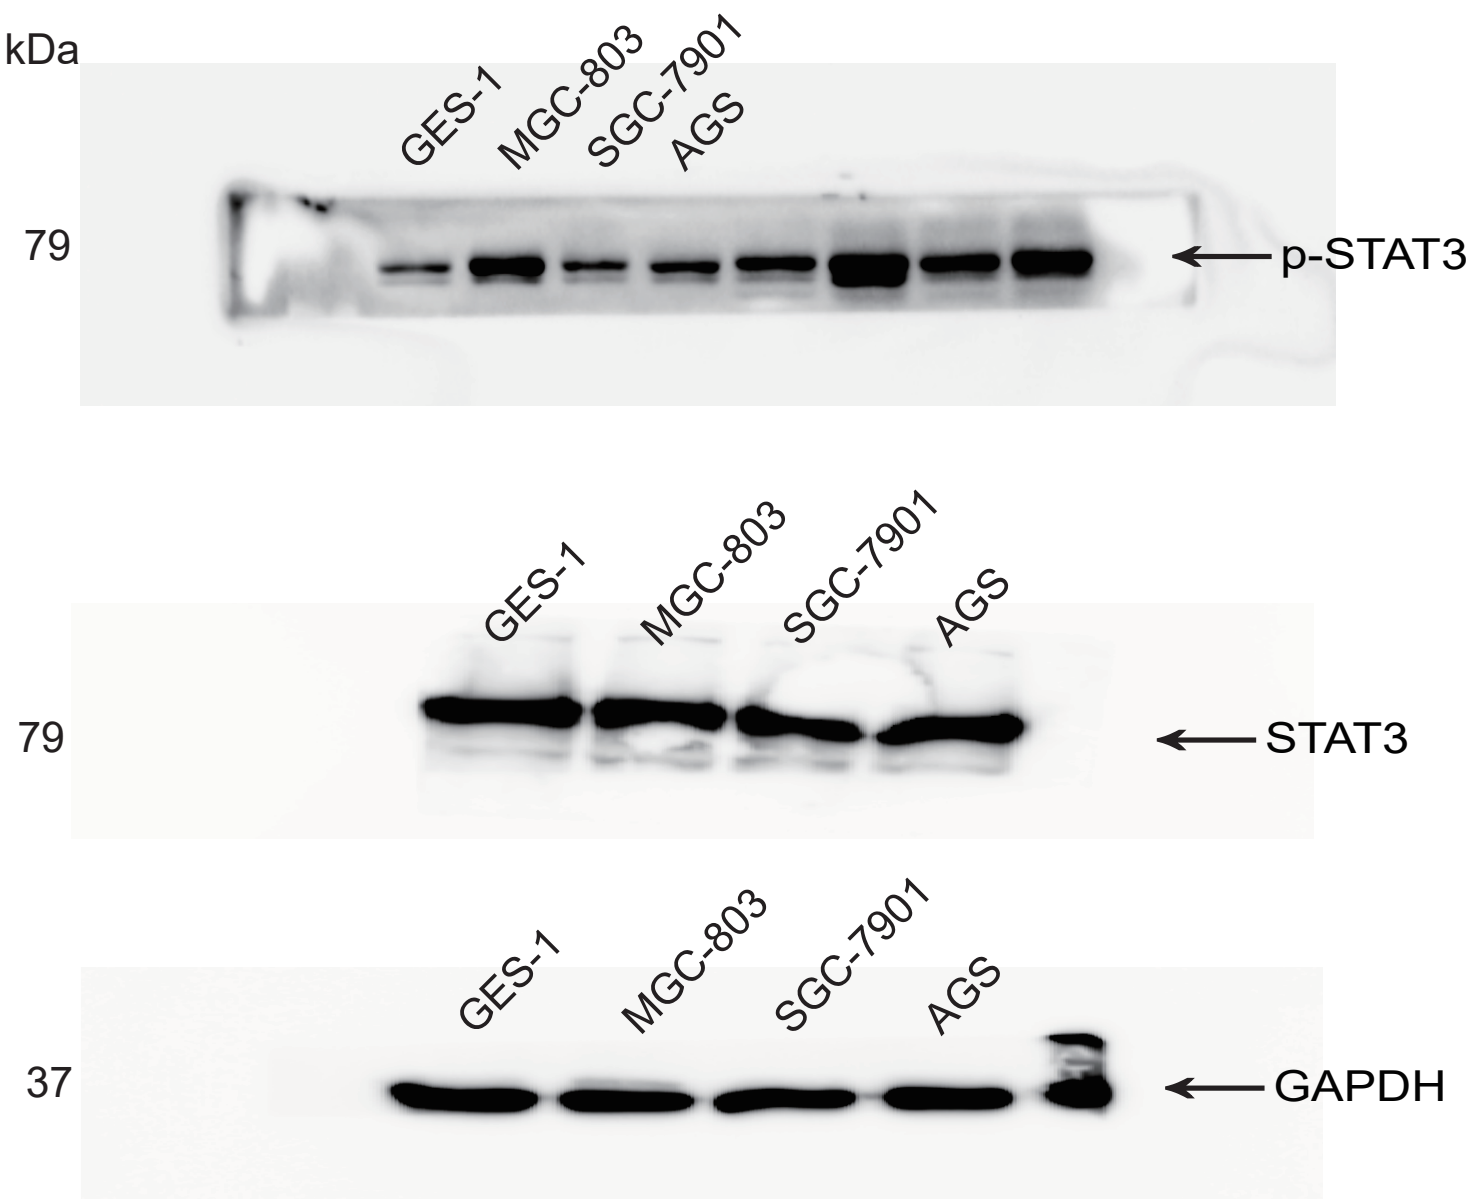

Figure 2C

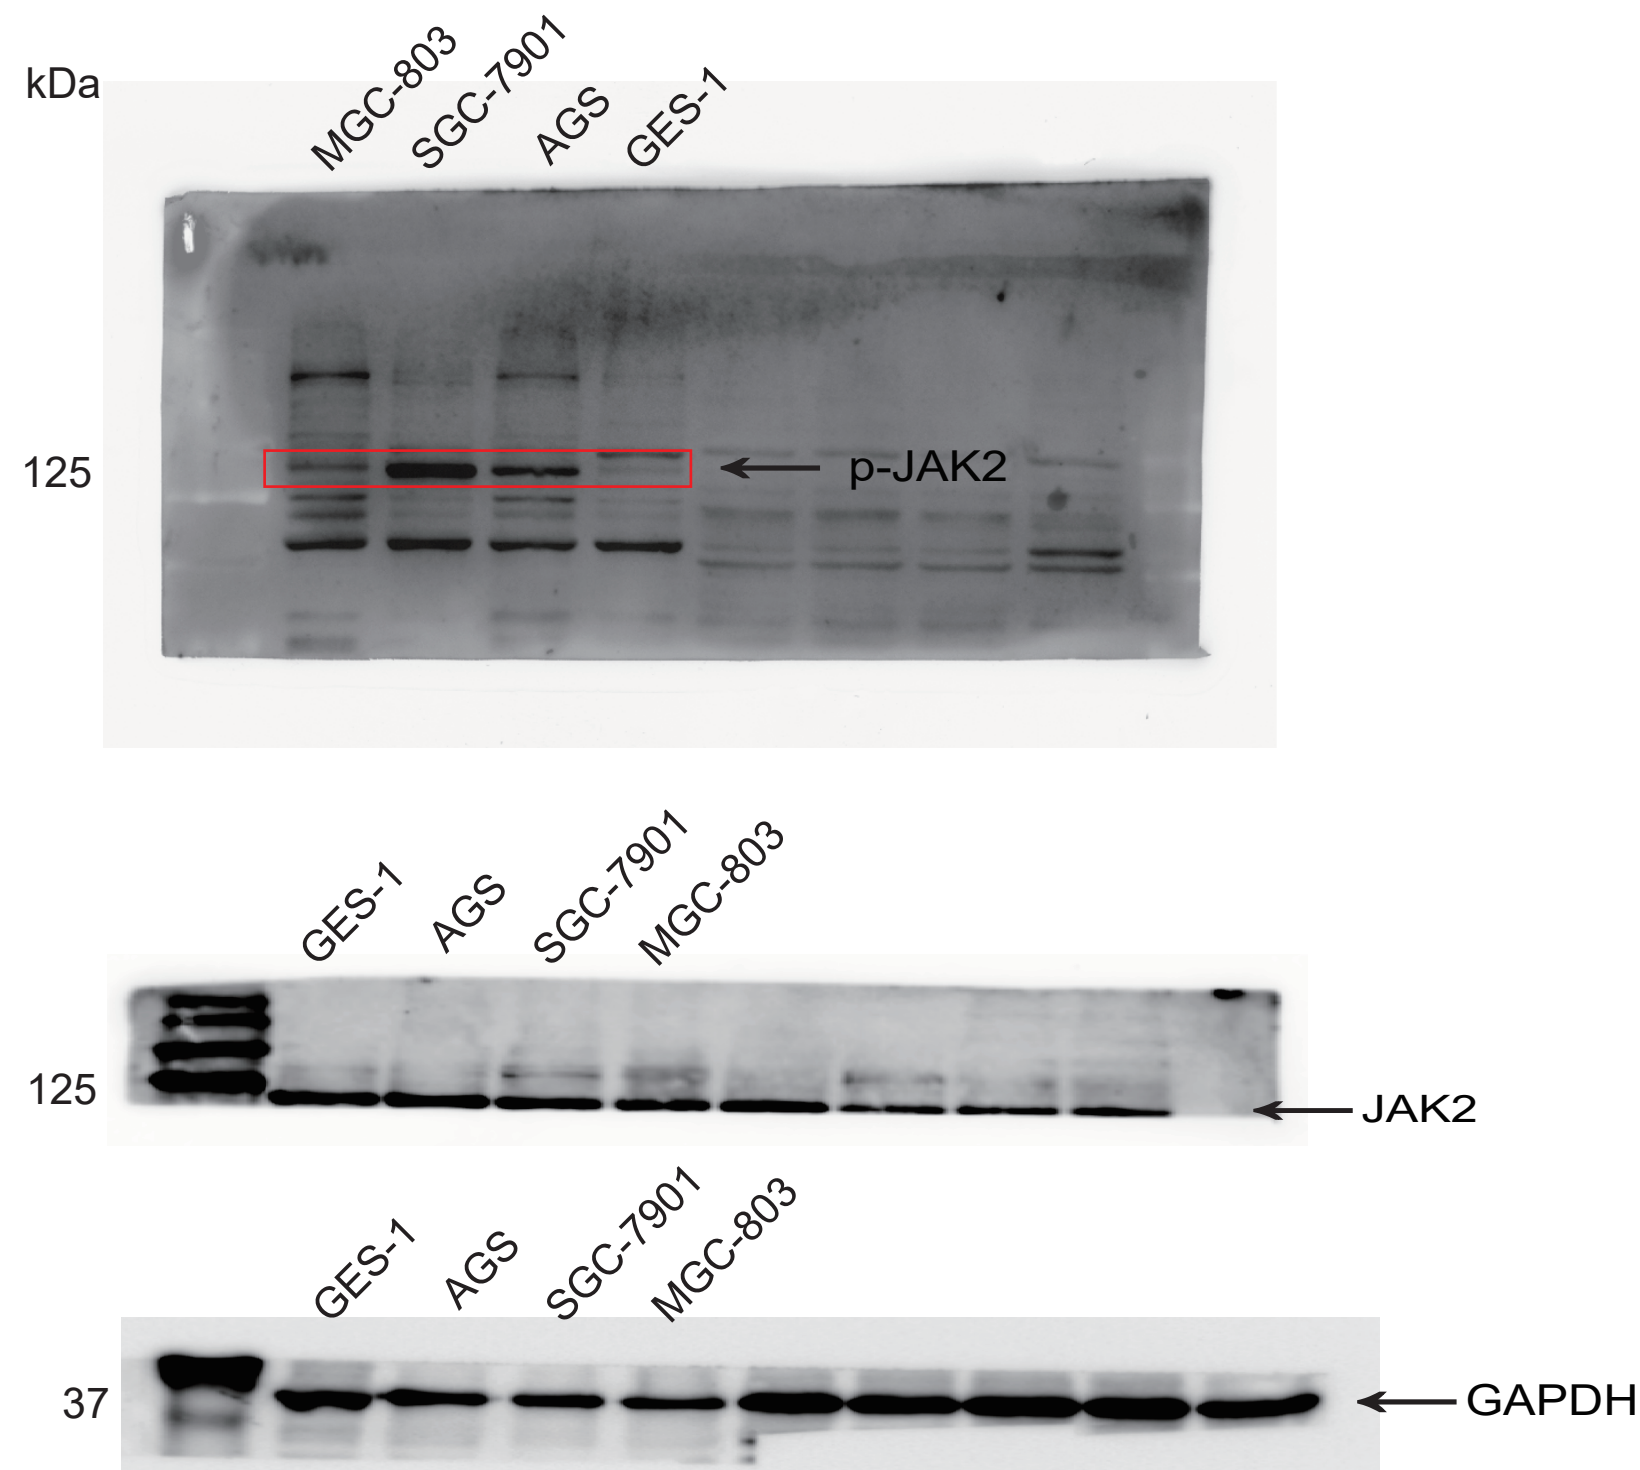

Supplement: s1 [file s1]

Figure 3B

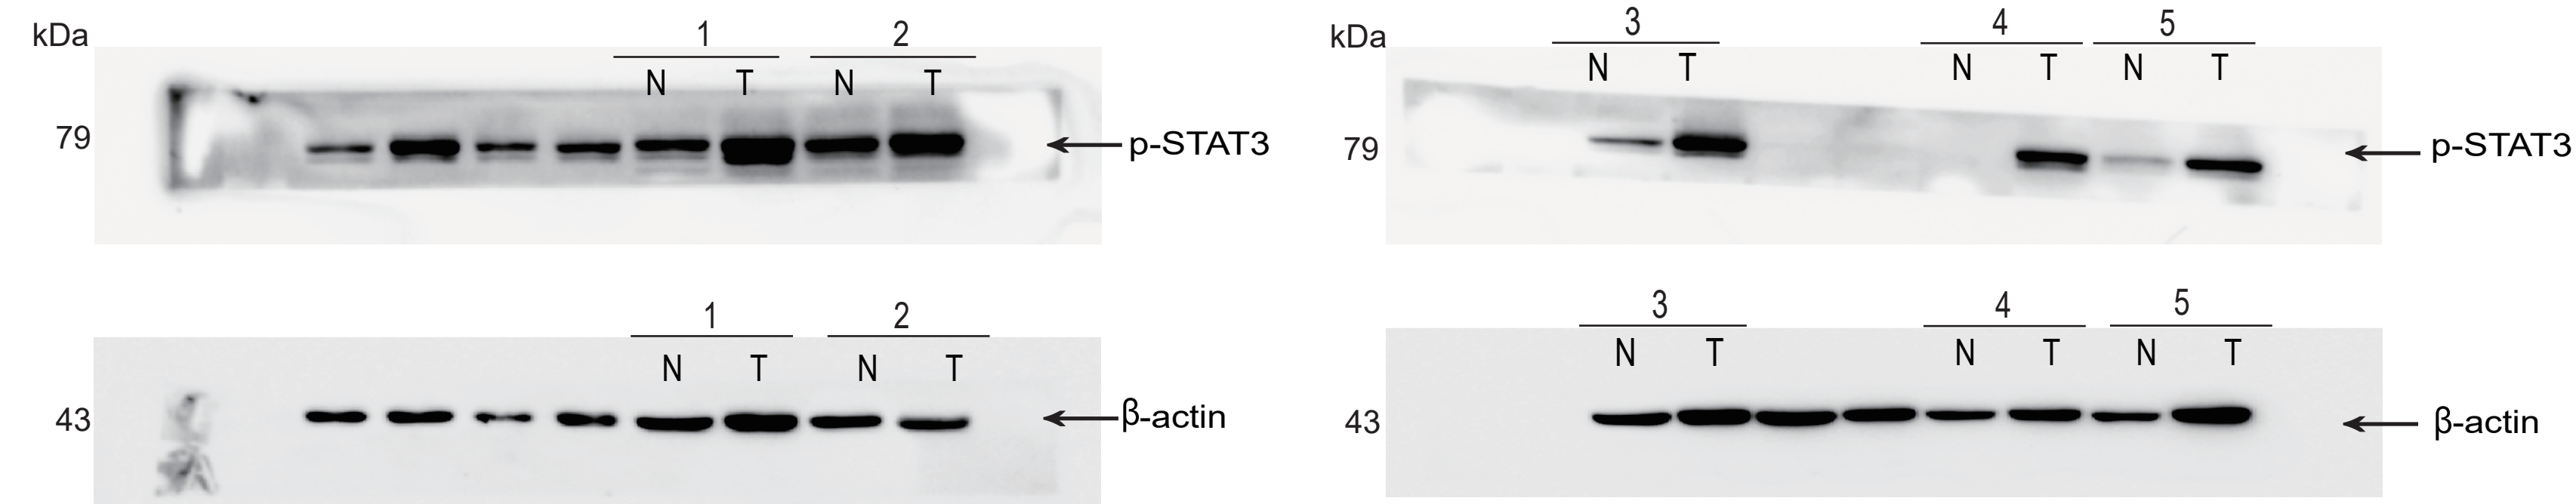

Supplement: s1 [file s1]

Figure 4E

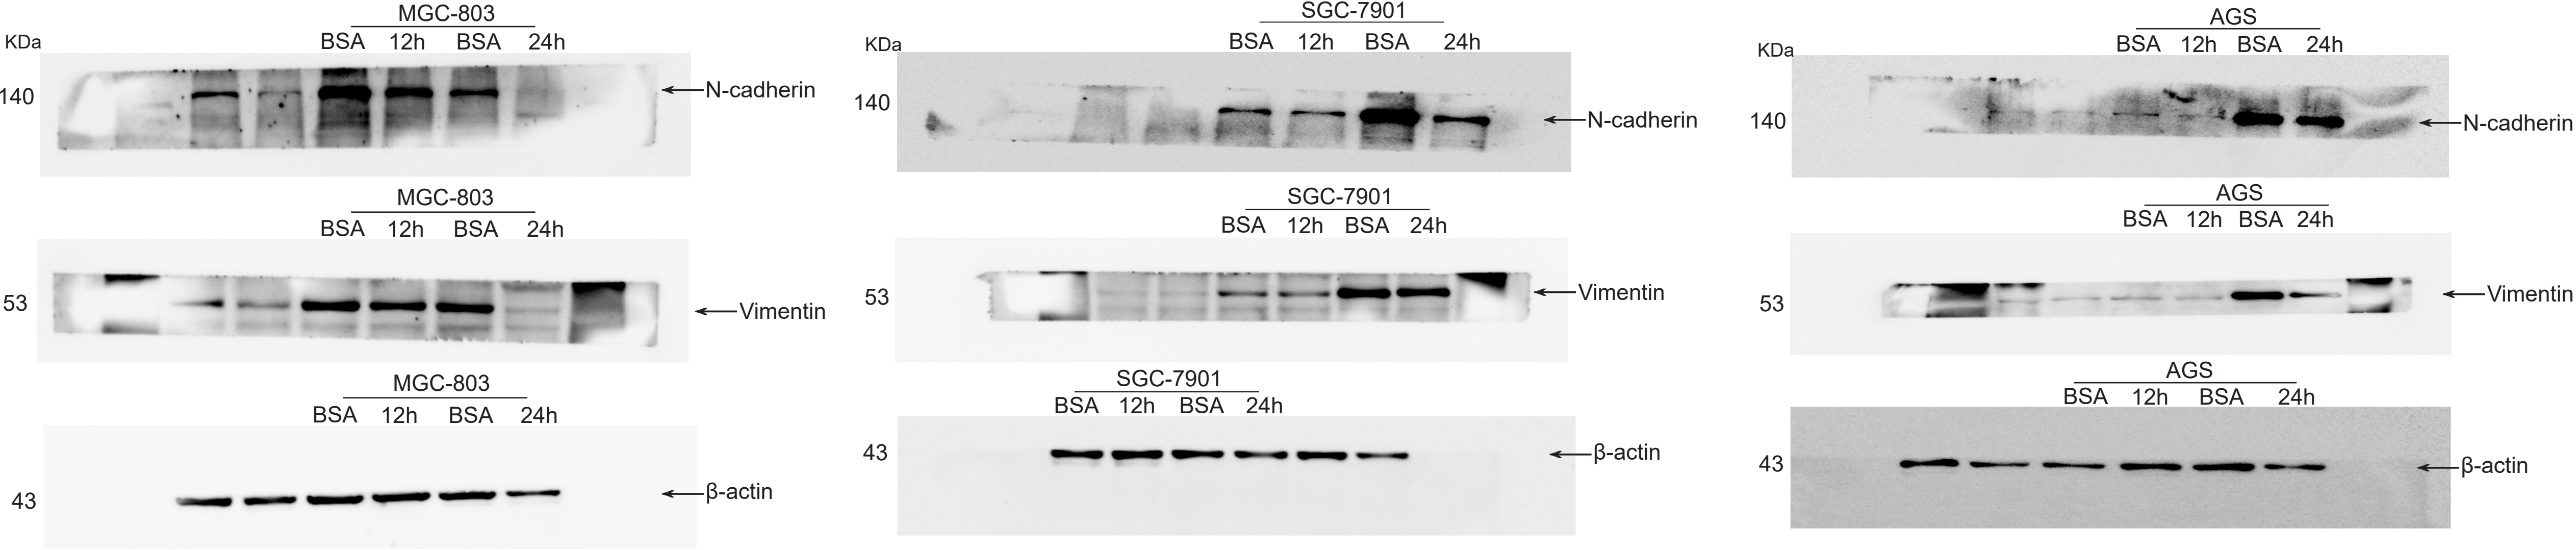

Supplement: s1 [file s1]
